# Supplementary material for: The Subtype Identity of Testicular Cancer Cells Determines Their Immunostimulatory Activity in a Coculture Model
Source: MDPI journal article supplement (doi:10.3390/cancers15092619), 2023-05-05
Supplement: s1 [file s1]

**Table S1. Primer sequences**

| <b>Gene</b>   | <b>Forward primer</b>                    | <b>Reverse primer</b>                    |
|---------------|------------------------------------------|------------------------------------------|
| <i>18SRNA</i> | <i>TCC AGG TCT TCA CGG AGC TTG TT</i>    | <i>GGA TGT AAA GGA TGG AAA ATA CA</i>    |
| <i>CD25</i>   | <i>GTG GTG GGG CAG ATG GTT TA</i>        | <i>TTG TGA CGA GGC AGG AAG TC</i>        |
| <i>CD69</i>   | <i>ACG CAG GTA GAG AGG AAC AC</i>        | <i>ACC CTG TAA CGT TGA ACC AGT</i>       |
| <i>CD163</i>  | <i>GCA GTT TCC TCA AGA GGA GAG AA</i>    | <i>ATG GCC TCC TTT TCC ATT CCA</i>       |
| <i>CD206</i>  | <i>CGA TCC GAC CCT TCC TTG ACT</i>       | <i>AGT ATG TCT CCG CTT CAT GCC</i>       |
| <i>CDK4</i>   | <i>ATG GCT ACC TCT CGA TAT GAG C</i>     | <i>CAT TGG GGA CTC TCA CAC TCT</i>       |
| <i>GDF3</i>   | <i>TGC TGT AAA ACT AAC CAA GGC TC</i>    | <i>ACA GTA GAT CCT CCA ACC CC</i>        |
| <i>IFNG</i>   | <i>CTG TAA CTG CCA GGA CCC AT</i>        | <i>TCT GTC ACT CTC CTC TTT CCA</i>       |
| <i>IL1B</i>   | <i>AGC CAT GGC AGA AGT ACC TG</i>        | <i>TGA AGC CCT TGC TGT AGT GG</i>        |
| <i>IL2</i>    | <i>TTT ACA TGC CCA AGA AGG CCA</i>       | <i>GCA CTT CCT CCA GAG GTT TG</i>        |
| <i>IL6</i>    | <i>TCA ATA TTA GAG TCT CAA CCC CCA</i>   | <i>TTC TCT TTC GTT CCC GGT GG</i>        |
| <i>KI67</i>   | <i>TCC TTT GGT GGG CAC CTA AGA CCT G</i> | <i>TGA TGG TTG AGG TCG TTC CTT GAT G</i> |
| <i>NANOG</i>  | <i>GAT TTG TGG GCC TGA AGA AA</i>        | <i>AAG TGG GTT GTT TGC CTT TG</i>        |
| <i>OCT3/4</i> | <i>CGA AAG AGA AAG CGA ACC AG</i>        | <i>GCC GGT TAC AGA ACC ACA CT</i>        |
| <i>PERF1</i>  | <i>GGG ATT CCA GAG CCC AAG TG</i>        | <i>GTG TGT CCA CTG GGA AGG AG</i>        |
| <i>SALL4</i>  | <i>TCC AGT TTA GCA CAA AGG GCA</i>       | <i>GGA GGA AAA TGA CGT CTG GC</i>        |
| <i>SOX2</i>   | <i>ATG CAC CGC TAC GAC GTG A</i>         | <i>CTT TTG CAC CCC TCC CAT T</i>         |
| <i>SOX17</i>  | <i>GGC GCA GCA GAA TCC AGA</i>           | <i>CCA CGA CTT GCC CAG CAT</i>           |
| <i>TNFA</i>   | <i>ATG GCC TCC CTC TCA TCA GT</i>        | <i>CTT GGT GGT TTG CTA CGA CG</i>        |
